# Supplementary material for: Dog ownership satisfaction determinants in the owner-dog relationship and the dog's behaviour
Source: PubMed Central journal article supplement (PMC6147508; doi:10.1371/journal.pone.0204592), 2018-09-20
Supplement: pone.0204592.s002.pdf [file pone.0204592.s002.pdf]

## S2 Appendix - Prevalence of dog aggression and obedience in 968 to 972 Dutch dog owners

Prevalence of dog aggression and two obedience behaviours based on the owner's assessments of different situations ( $N=968$  to  $972$ , with precise sample sizes between brackets).

| Behaviour                                            | Sometimes, often,<br>or always | Never or nearly<br>never |
|------------------------------------------------------|--------------------------------|--------------------------|
| Aggression at vet/groomer                            | 8% (75)                        | 92% (896)                |
| Aggression near bowl, bone, toy                      | 6% (57)                        | 94% (915)                |
| Aggression towards familiar dog on territory         | 17% (162)                      | 83% (807)                |
| Aggression towards unfamiliar dog on territory       | 36% (350)                      | 64% (622)                |
| Aggression towards dog off territory                 | 32% (311)                      | 68% (661)                |
| Aggression towards owner/family member               | 2% (21)                        | 98% (951)                |
| Aggression towards child                             | 6% (54)                        | 94% (917)                |
| Aggression towards adult                             | 8% (79)                        | 92% (889)                |
| Obedience by coming when called                      | 98% (948)                      | 2% (24)                  |
| Disobedience by jumping up/pushing against<br>people | 38% (365)                      | 62% (607)                |
