# Supplementary material for: Dog ownership satisfaction determinants in the owner-dog relationship and the dog's behaviour
Source: PLoS One. 2018 Sep 20;13(9):e0204592. doi: 10.1371/journal.pone.0204592 (PMC6147508; doi:10.1371/journal.pone.0204592)
Supplement: S1 Appendix — Questionnaire items other than Monash Dog Owner Relationship Scale (MDORS), gathering information on the dog and dog ownership. (PDF) [file pone.0204592.s001.pdf]

## **S1 Appendix - Questionnaire items, other than MDORS**

Questionnaire items other than Monash Dog Owner Relationship Scale (MDORS), gathering information on the dog and dog ownership

### *General questions on the dog:*

1. Of which breed or type is your dog?

[open]

2. Does your dog have an FCI-pedigree?

[yes/no]

3. Which age is your dog?

[<4 months/4-6 months/6-12 months/1-2 years/2-5years/5-10 years/>10 years]

4. Is your dog female or male?

[female/male]

5. Is your dog intact?

[yes/no]

6. Which coat type does your dog have?

[short, thick coat/short, thin coat/middle length, thick coat/middle length, thin coat/long thick coat/long thin coat]

### *Questions on dog ownership:*

7. How satisfied are you with your dog?

[not at all satisfied/not very satisfied/moderately satisfied/satisfied/very satisfied]

8. Does your dog meet the wishes you had when you bought it?

[yes/no]

9. Which reason for having a dog fits your situation best?

[for company/because it is pretty/for the children/as companion on walks/to practice a dog sport/for guarding purposes/for work, other than guarding/other]

10. How would you type your dog for:

a. energy level

[highly active/active/normal/calm/very calm]

b. stubbornness versus mellowness

[very stubborn/stubborn/normal/mellow/very mellow]

c. stability versus sensitivity?

[very stable/stable/normal/sensitive/very sensitive]

11. How did you prepare for becoming a dog owner?

[not at all/information from relatives/information from breeder/information from internet/reading books/information from organization/other]

12. How much time was in between the moment of deciding to have a dog and actually getting it?

[<1 week/1-4 weeks/1-6 months/>6 months]

13. Is this your first dog (being a child younger than 16 years not included)?

[yes/no]

14. Did you grow up as a child younger than 16 years with a dog?

[yes/no]

15. Through which channel did you acquire your dog?

[single nest 'in house' breeder/breeding kennel or shed/store or market/home delivered/shelter/relatives/foreign dog placement organization/Dutch rehoming organization/own breeding/self-obtained from abroad]

16. Did you choose this way of acquiring the dog purposely?

[yes/no]

17. Did you visit the place/organisation where you bought your dog more than once?

[yes/no]

18. Did the seller have a conversation with you of more than 30 minutes upon buying the dog?

[yes/no]

19. Did the seller contact you after acquisition to learn how things are with the dog?

[yes/no]

20. Did you use after care, if provided by the seller?

[yes/no]

21. Did your dog reside at a foster home, before your acquisition of it?

[yes/no]

22. To your knowledge, was your dog ever in a shelter?

[yes/no]

23. What was the age of the dog at acquisition?

[<7 weeks/7-12 weeks/3-6 months/6-12 months/1-2 years/2-5years/5-10 years/>10 years]

24. Was your dog checked for disease or disorder before you acquired it?

[yes/no]

25. Have you ever contemplated rehoming your dog with a relative or via a shelter?

[yes/no]

26. How much did you pay for your dog at acquisition?

[<100 euro/100-200 euro/200-500 euro/500-1000 euro/>1000 euro]

27. If you had another chance of acquiring a dog, would you buy one?

[yes/no]

28. Would it be of a same or different breed or type than you have now?

[yes/no]

29. Is your dog presently suffering from disease or disorder?

[yes/no]

30. Has your dog previously suffered from disease or disorder?

[yes/no]

a. If so, which?

[open]

31. Indicate how often your dog:

- a. Exercises off leash in populated area
- b. Exercises off leash outside out-side populated area
- c. Comes immediately when called

[never/nearly never/sometimes/often/always]

32. How many dogs live with you, next to the dog you are filling out this survey for?

[0/1/2/>2]

33. Indicate how often your dog:

- a. Pulls on leash
- b. Pees or poops in the house
- c. Runs away
- d. Runs after game or stock
- e. Runs after bikers/runners/riders
- f. Barks/wines/howls when alone
- g. Destroys
- h. Is overly active by jumping up/pushing against you
- i. Is hyperactive or restless
- j. Begs for food or attention
- k. Steals food
- l. Eats poop from other animals
- m. Rolls in poop, dead animals or garbage

- n. Exhibits strange or repetitive behaviour as chasing its own tail.

[never/nearly never/sometimes/often/always]

34. Indicate how often in below situations your dog shows one or more of these behaviours:

seeks shelter behind your legs or an object, walks away, runs, freezes, whines, shakes or keeps its tail between its legs

- a. When at the vet or groomer
- b. When nearby other dogs
- c. With children
- d. With adults
- e. When hearing loud noises
- f. In traffic or at encountering strange objects
- g. In new or unexpected situations

[never/nearly never/sometimes/often/always]

35. Indicate how often in below situations your dog shows one or more of these behaviours:

barking, growling, raising lips, baring teeth, snapping, biting

- a. When at the vet or groomer
- b. When near its bowl, bone, toy
- c. When nearby known dogs in its own home or garden
- d. When nearby unknown dogs in its own home or garden
- e. When nearby dogs outside its own home or garden
- f. Directed at you or family member
- g. Directed at children
- h. Directed at adults

[never/nearly never /sometimes/often/always]

36. Have you visited a dog school with your dog?

[yes/no]

- a. If so, how long?

[1-8 weeks/2-6 months/6-12 months/>1 year]

- b. Which training aids were used?

[play/food/clicker/correction chain/other]

37. Does your dog learn what you wish him to, quickly?

[yes/no]

38. Are you able to influence behaviour of your dog with:

- a. his normal food,

[yes/no]

- b. tasty food,

[yes/no]

- c. the promise of playing together or getting a ball?

[yes/no]

39. Is your dog quickly distracted by sounds, smells, things he sees?

[never/nearly never /sometimes/often/always]

40. Are you satisfied with the possibilities of walking the dog nearby your home?

[yes/no]

41. Is it possible to walk 30 minutes or more with the dog within ten minutes walking distance from you home?

[yes/no]

42. How much time do you spend walking on a weekday with your dog on average?

[<15 min/15-30 min/30-60 min/60-90 min/>90 min]

43. Are you satisfied with community policies on dogs?

[yes/no]

44. How much time is your dog at home alone per week or day on average?

[not at all/<8 hours per week/1-4 hours per day/4-6 hours per day/6-8 hours per day/8-10 hours per day/>10 hours per day]

45. How often do you play with your dog on average?

[not at all/<15 min per week/15-60 min per week/5-10 min per day/10-15 min per day/15-30 min per day/>30 min per day]

46. How often do you take care of your dog's coat?

[not at all/daily/weekly/monthly or less]

47. How often do you de-flea your dog?

[not at all/wearing flea collar/about once per quarter/about once per half year/about once per year]

48. How often do you deworm your dog?

[not at all/about once per quarter/about once per half year/about once per year]

49. How often do you give bones/chewing material to your dog?

[daily/nearly daily/few times per week/once per week/once per month/once per quarter/once per year/never]

50. Does your dog ever go out with a walking service?

[yes/no]

51. Do you clean after your dog in populated area?

[never/nearly never/sometimes/often/always]

52. Do you clean after your dog outside of populated area?

[never/nearly never/sometimes/often/always]

53. Do you put your dog on leash or in heel position when approaching a leashed dog?

[never/nearly never/sometimes/often/always]

54. Do you put your dog on leash or in heel position when approaching people in recreational

areas?

[never/nearly never/sometimes/often/always]
